# Supplementary material
Source: HighWire-hosted journal article supplement (https://ijgc.bmj.com/content/30/9/1269)
Supplement: inline-supplementary-material-2 [file inline-supplementary-material-2.pdf]

## SUCCOR STUDY: An international European cohort observational study comparing minimally invasive surgery versus open abdominal radical hysterectomy in patients with stage IB1 cervical cancer

Luis Chiva, Vanna Zanagnolo, Denis Querleu, Nerea Martin-Calvo, Juan Arévalo-Serrano, Mihai Emil Căpîlna, Fagotti Anna, Ali Kucukmetin, Constantijne Mom, Galina Chakalova, Aliyev Shamistan, Mario Malzoni, Fabrice Narducci, Octavio Arencibia, Francesco Raspagliesi, Tayfun Toptas, David Cibula, Dilyara Kaidarova, Mehmet Mutlu Meydanli, Mariana Tavares, Dmytro Golub, Anna Myriam Perrone, Robert Poka, Dimitrios Tsolakidis, Goran Vujic, Marcin A Jedryka, Petra Zusterzeel, Jogchum Jan Beltman, Frederic Goffin, Dimitrios Haidopoulos, Herman Haller, Robert Jach, Iryna Yezhova, Igor Berlev, Margarida Bernardino, Rasiah Bharathan, Maximilian Lanner, Minna M Maenpaa, Vladyslav Sukhin, Jean-Guillaume Feron, Robert Fruscio, Kersti Kukk, Jordi Ponce, Jose Angel Minguez, Daniel Vázquez-Vicente, Teresa Castellanos, Enrique Chacon, Juan Luis Alcazar et al, **on behalf on SUCCOR STUDY GROUP**

### Conclusions

1. **Minimally invasive surgery** in European patients with FIGO 2009 stage IB1 cervical cancer **increased the risk of relapse and death.**
2. Patients that underwent minimally invasive surgery **using a uterine manipulator had a 2.76-times higher hazard of relapse.**
3. Avoiding uterine manipulator and implementing a **protective vaginal closure was associated with disease-free-survival similar to that of open surgery.**

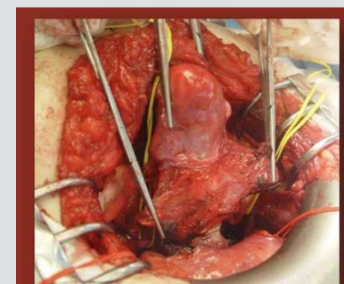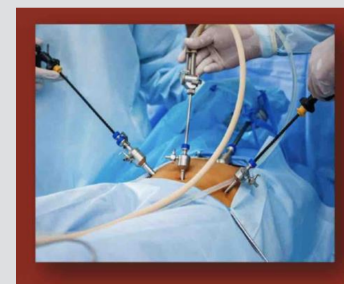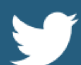

@IJGOnline

View Full Text: <https://ijgc.bmj.com/content/early/2020/08/11/ijgc-2020-001506>

Copyright © 2020 BMJ Publishing Group Ltd, International Gynecologic Cancer Society, & European Society of Gynaecological Oncology. All rights reserved.
